# Supplementary material
Source: PubMed Central journal article supplement (PMC4721950)
Supplement: NIHMS741739-supplement-Supporting_Information.pdf [file NIHMS741739-supplement-Supporting_Information.pdf]

**Table S1.** Expected and observed peptide masses by MALDI-TOF MS.

| Peptide        | [M+H] <sup>+</sup> <i>m/z</i> |          |                  | Expected | Observed |
|----------------|-------------------------------|----------|------------------|----------|----------|
|                | Expected                      | Observed |                  |          |          |
| $\alpha$ -host | 2223.1                        | 2223.4   | P5 $\beta^3$     | 2237.1   | 2236.8   |
| P5Ala          | 2138.0                        | 2137.6   | P4 $\beta^3$     | 2237.1   | 2236.9   |
| P4Ala          | 2195.1                        | 2194.8   | P3 $\beta^3$     | 2237.1   | 2236.8   |
| P3Ala          | 2180.1                        | 2179.9   | P2 $\beta^3$     | 2237.1   | 2236.1   |
| P1Ala          | 2131.1                        | 2131.4   | P1 $\beta^3$     | 2237.1   | 2237.1   |
| P1'Ala         | 2166.1                        | 2165.8   | P1' $\beta^3$    | 2237.1   | 2237.4   |
| P2'Ala         | 2207.1                        | 2205.9   | P2' $\beta^3$    | 2237.1   | 2237.0   |
| P5D            | 2223.1                        | 2221.2   | P3' $\beta^3$    | 2237.1   | 2236.0   |
| P4D            | 2223.1                        | 2222.5   | P5Aib            | 2152.1   | 2151.8   |
| P3D            | 2223.1                        | 2222.3   | P4Aib            | 2209.1   | 2208.6   |
| P2D            | 2223.1                        | 2223.1   | P3Aib            | 2194.1   | 2193.9   |
| P1D            | 2223.1                        | 2221.9   | P2Aib            | 2237.1   | 2237.3   |
| P1'D           | 2223.1                        | 2223.5   | P1Aib            | 2145.1   | 2143.6   |
| P2'D           | 2223.1                        | 2223.1   | P1'Aib           | 2180.1   | 2179.6   |
| P3'D           | 2223.1                        | 2221.5   | P2'Aib           | 2221.1   | 2220.8   |
| P5N-Me         | 2237.1                        | 2236.8   | P3'Aib           | 2237.1   | 2236.6   |
| P4N-Me         | 2237.1                        | 2236.3   | P2-P2' $\beta^3$ | 2251.1   | 2249.4   |
| P3N-Me         | 2237.1                        | 2236.7   | P3-P2' $\beta^3$ | 2251.1   | 2250.1   |
| P2N-Me         | 2237.1                        | 2237.5   | P4-P2' $\beta^3$ | 2251.1   | 2250.9   |
| P1N-Me         | 2237.1                        | 2236.6   | P4-P3' $\beta^3$ | 2251.1   | 2250.0   |
| P1'N-Me        | 2237.1                        | 2237.4   | P5-P3' $\beta^3$ | 2251.1   | 2250.6   |
| P2'N-Me        | 2237.1                        | 2236.4   | P4-P3'D          | 2223.1   | 2223.1   |
| P3'N-Me        | 2237.1                        | 2237.0   | P4-P3'N-Me       | 2251.1   | 2250.9   |
|                |                               |          | P4-P3'Aib        | 2223.1   | 2222.7   |

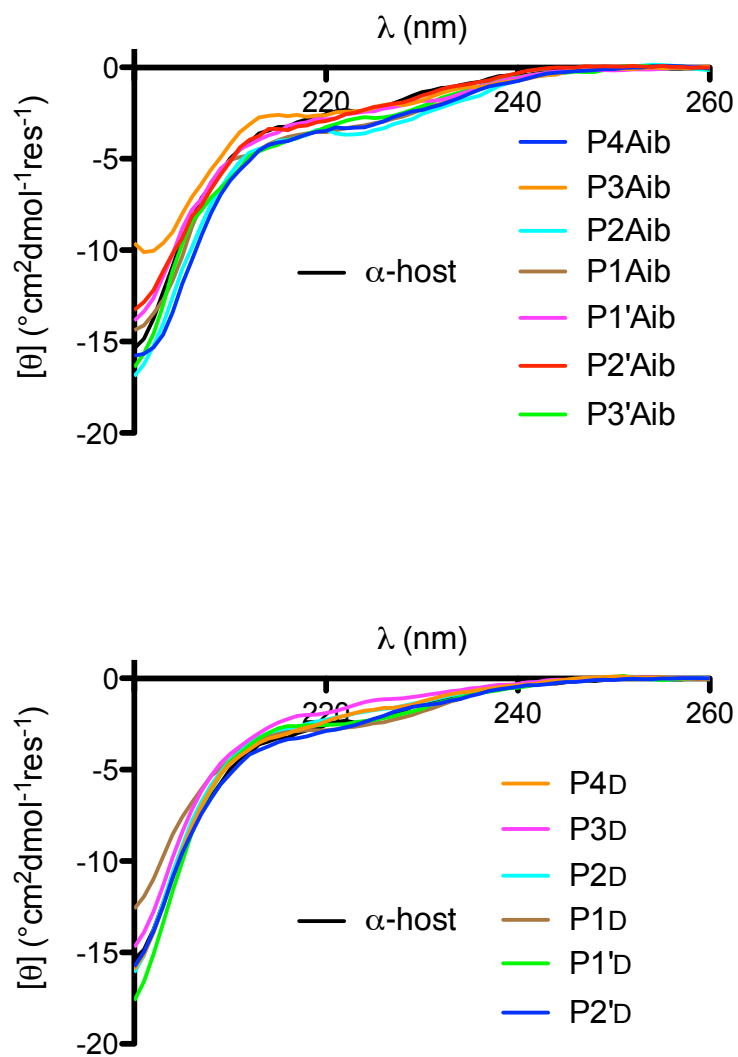

**Figure S1.** Circular dichroism (CD) scan spectra of  $\alpha$ -host peptide compared with Aib (top) and D-residue (bottom) substituted peptides.

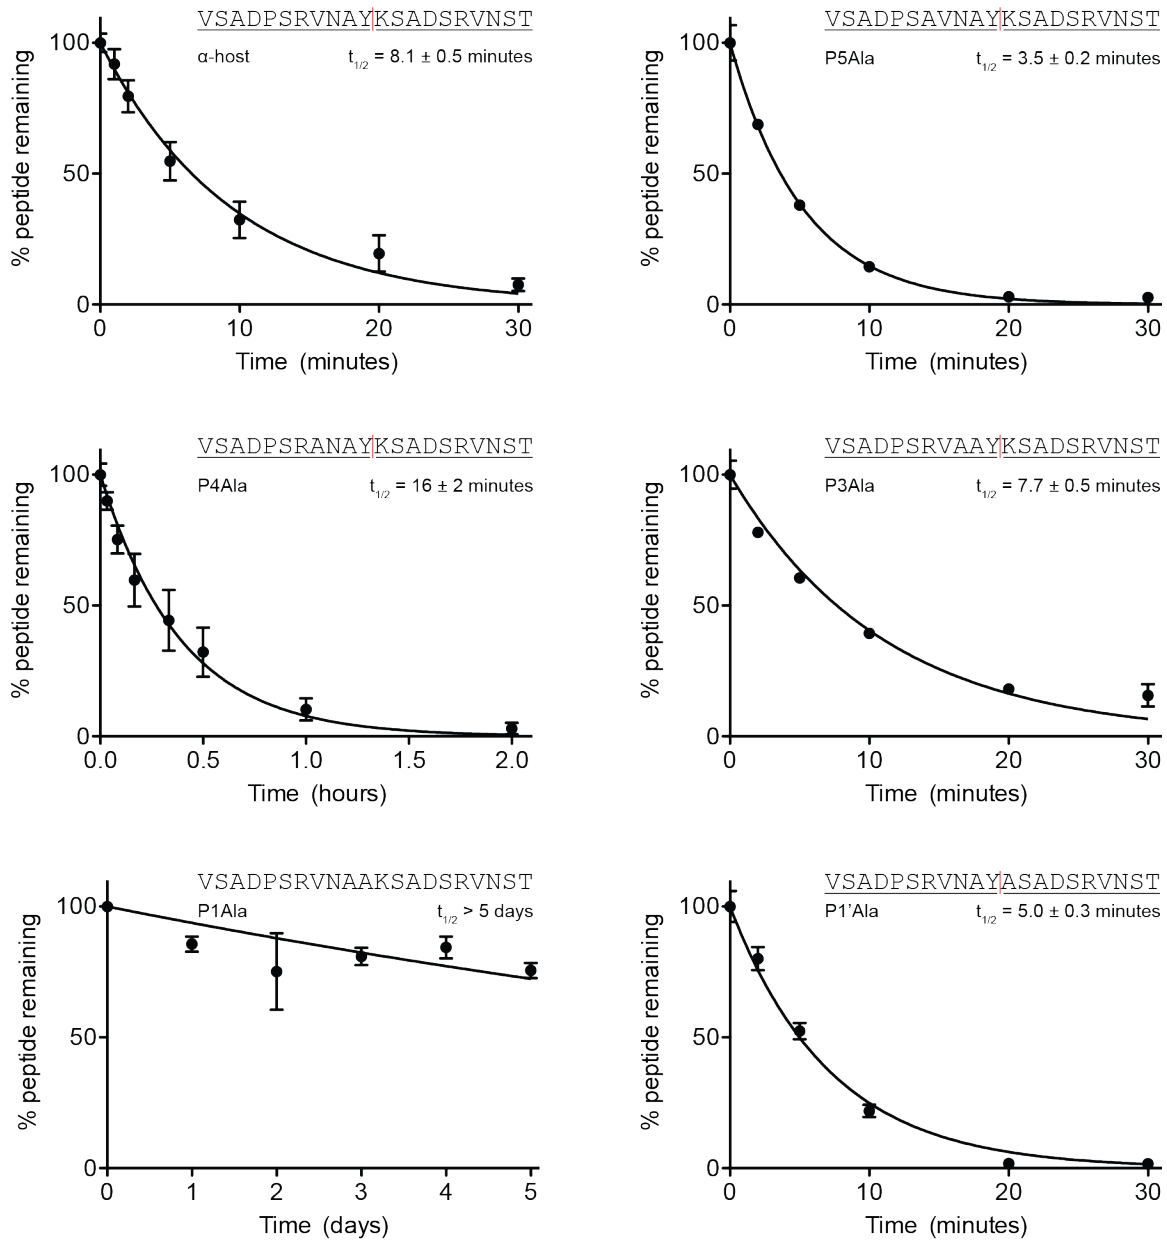

**Figure S2.** Full progress degradation curves and calculated half-lives of various peptides. Observed proteolysis products (horizontal black lines) and corresponding cleavage sites (vertical red lines) for each peptide are indicated in its sequence. Data points represent at least two replicate proteolysis experiments and are modeled by a one-phase decay fit with a variable plateau value  $Y = (Y_0 - Y_p) e^{-kx} + Y_p$  (solid curve).

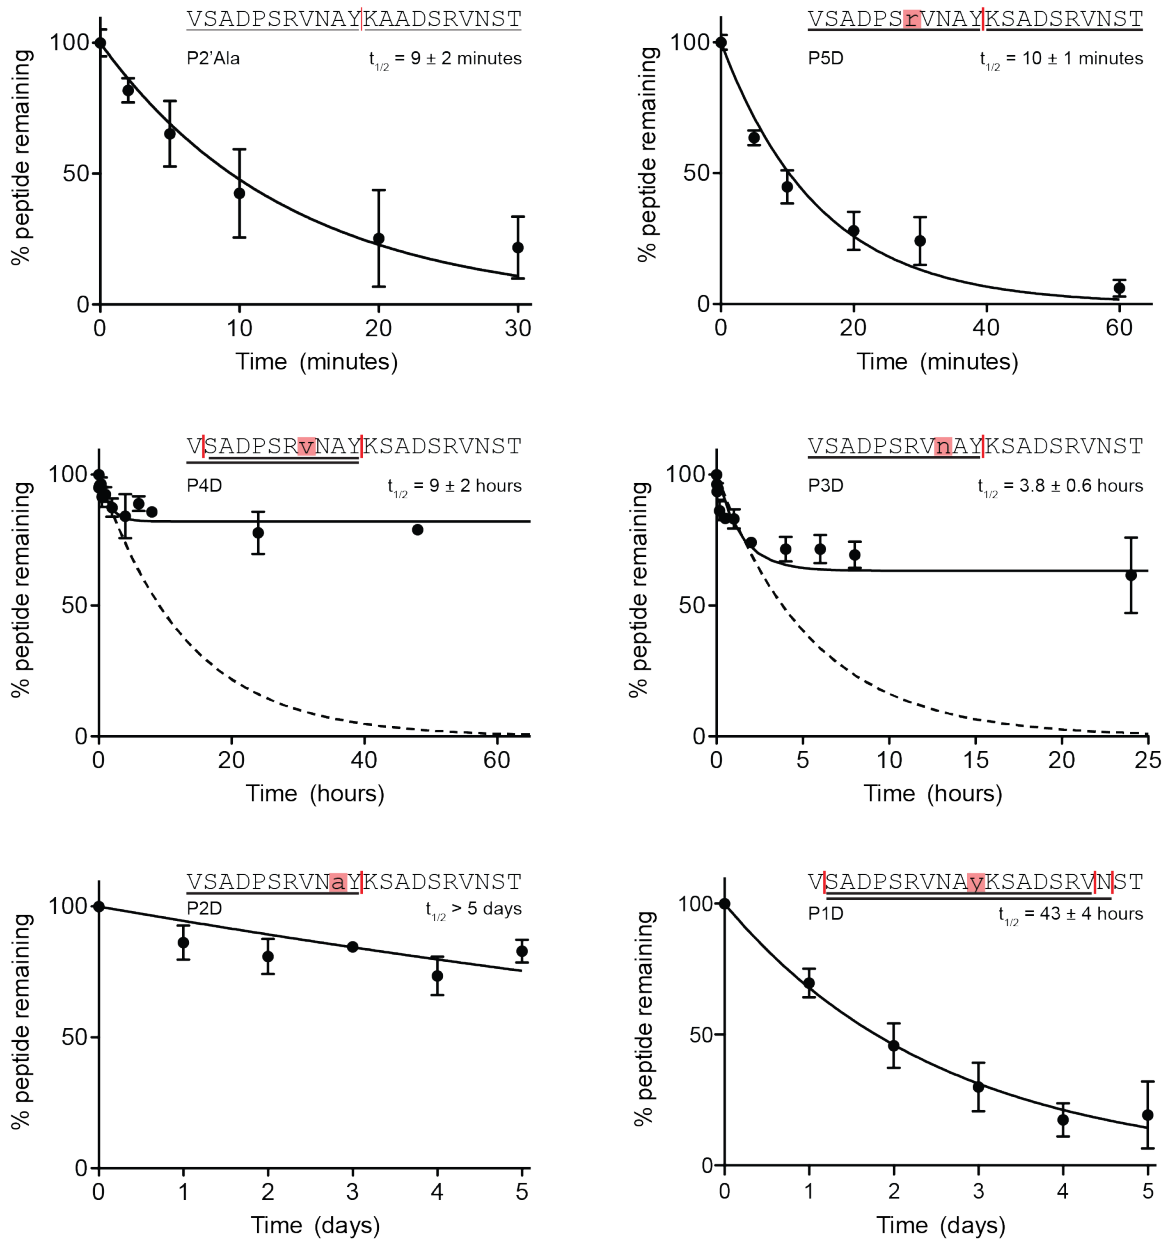

**Figure S3.** Full progress degradation curves and calculated half-lives of various peptides. Observed proteolysis products (horizontal black lines) and corresponding cleavage sites (vertical red lines) for each peptide are indicated in its sequence. Data points represent at least two replicate proteolysis experiments and are modeled by a one-phase decay fit with a variable plateau value  $Y = (Y_0 - Y_p) e^{-kx} + Y_p$  (solid curve). For peptides that did not degrade fully, the earliest data points are modeled by a one-phase decay model with a plateau constrained to zero  $Y = (Y_0) e^{-kx}$  (hashed curve).

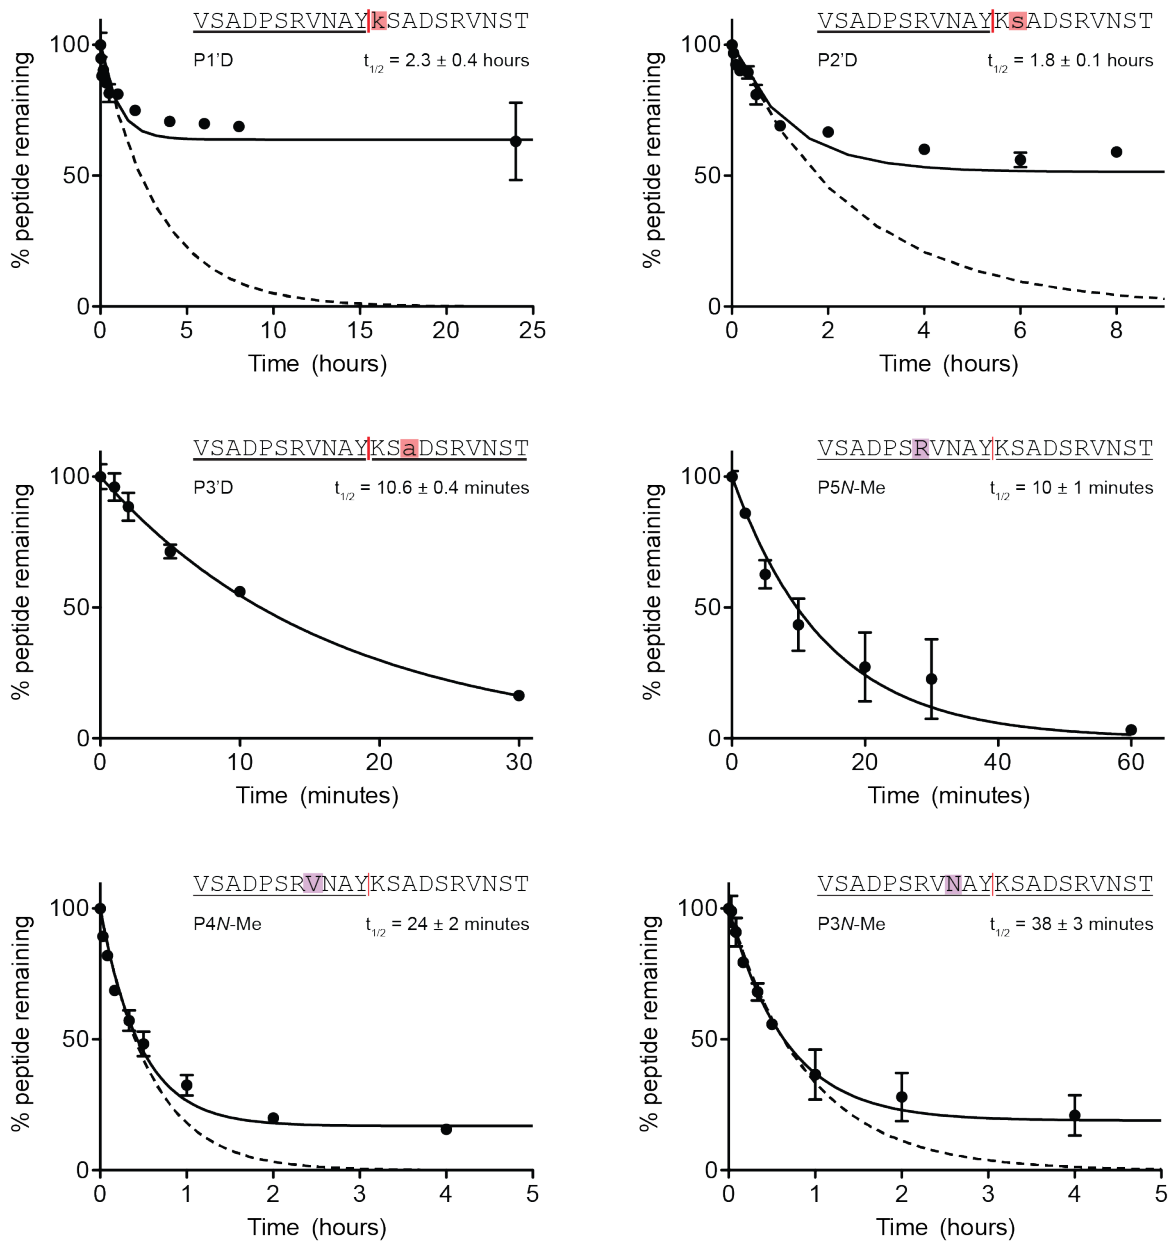

**Figure S4.** Full progress degradation curves and calculated half-lives of various peptides. Observed proteolysis products (horizontal black lines) and corresponding cleavage sites (vertical red lines) for each peptide are indicated in its sequence. Data points represent at least two replicate proteolysis experiments and are modeled by a one-phase decay fit with a variable plateau value  $Y = (Y_0 - Y_p) e^{-kx} + Y_p$  (solid curve). For peptides that did not degrade fully, the earliest data points are modeled by a one-phase decay model with a plateau constrained to zero  $Y = (Y_0) e^{-kx}$  (hashed curve).

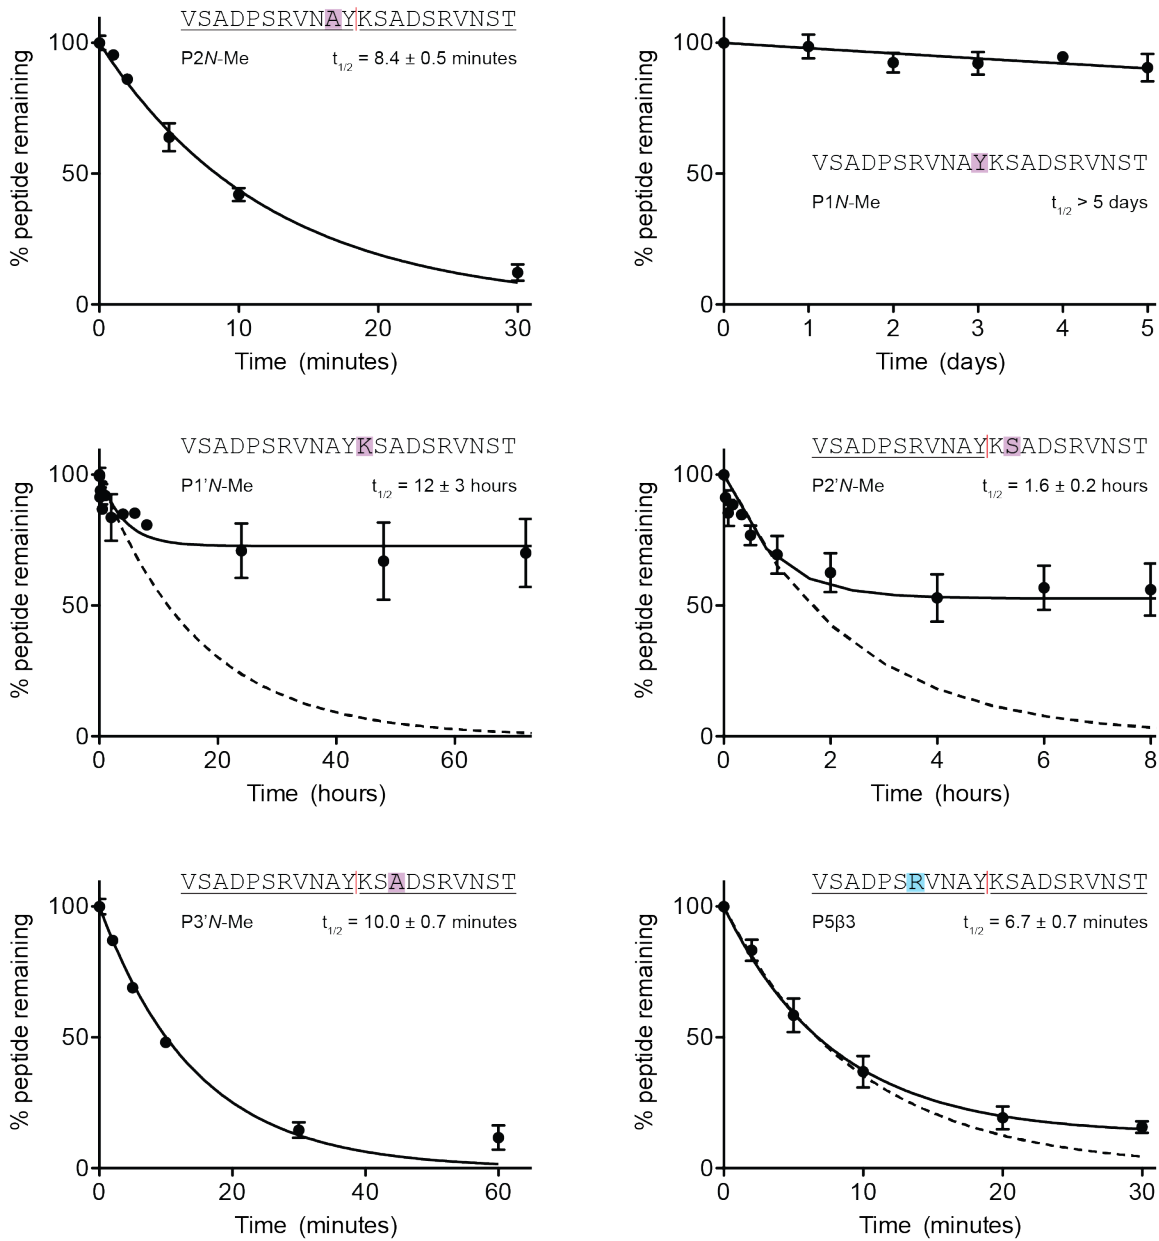

**Figure S5.** Full progress degradation curves and calculated half-lives of various peptides. Observed proteolysis products (horizontal black lines) and corresponding cleavage sites (vertical red lines) for each peptide are indicated in its sequence. Data points represent at least two replicate proteolysis experiments and are modeled by a one-phase decay fit with a variable plateau value  $Y = (Y_0 - Y_p) e^{-kx} + Y_p$  (solid curve). For peptides that did not degrade fully, the earliest data points are modeled by a one-phase decay model with a plateau constrained to zero  $Y = (Y_0) e^{-kx}$  (hashed curve).

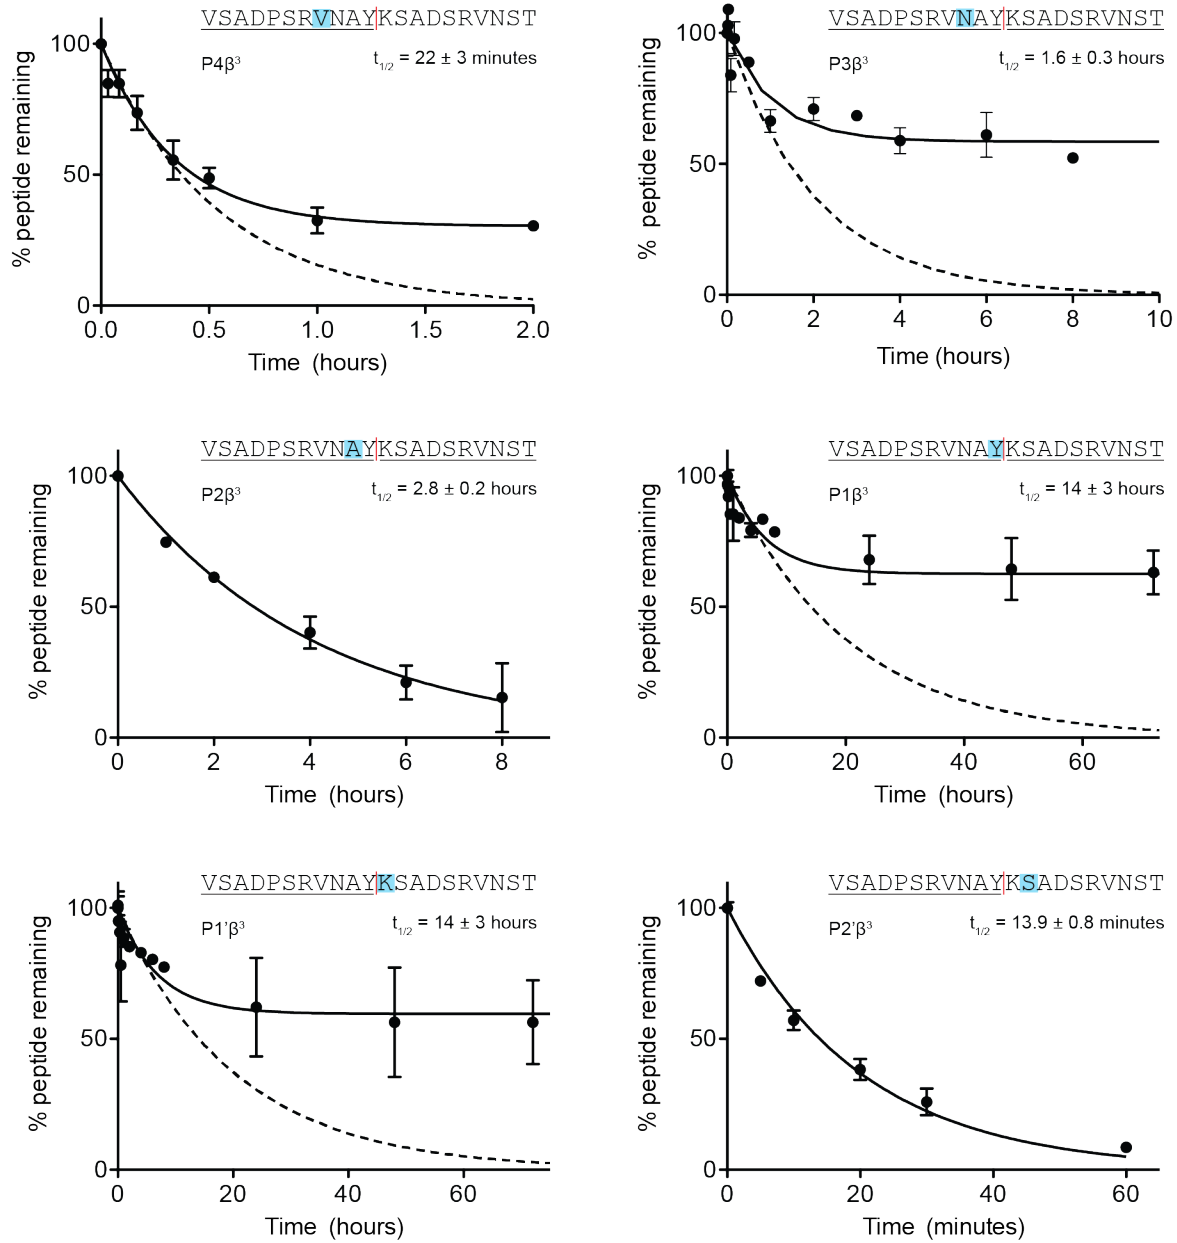

**Figure S6.** Full progress degradation curves and calculated half-lives of various peptides. Observed proteolysis products (horizontal black lines) and corresponding cleavage sites (vertical red lines) for each peptide are indicated in its sequence. Data points represent at least two replicate proteolysis experiments and are modeled by a one-phase decay fit with a variable plateau value  $Y = (Y_0 - Y_P) e^{-kx} + Y_P$  (solid curve). For peptides that did not degrade fully, the earliest data points are modeled by a one-phase decay model with a plateau constrained to zero  $Y = (Y_0) e^{-kx}$  (hashed curve).

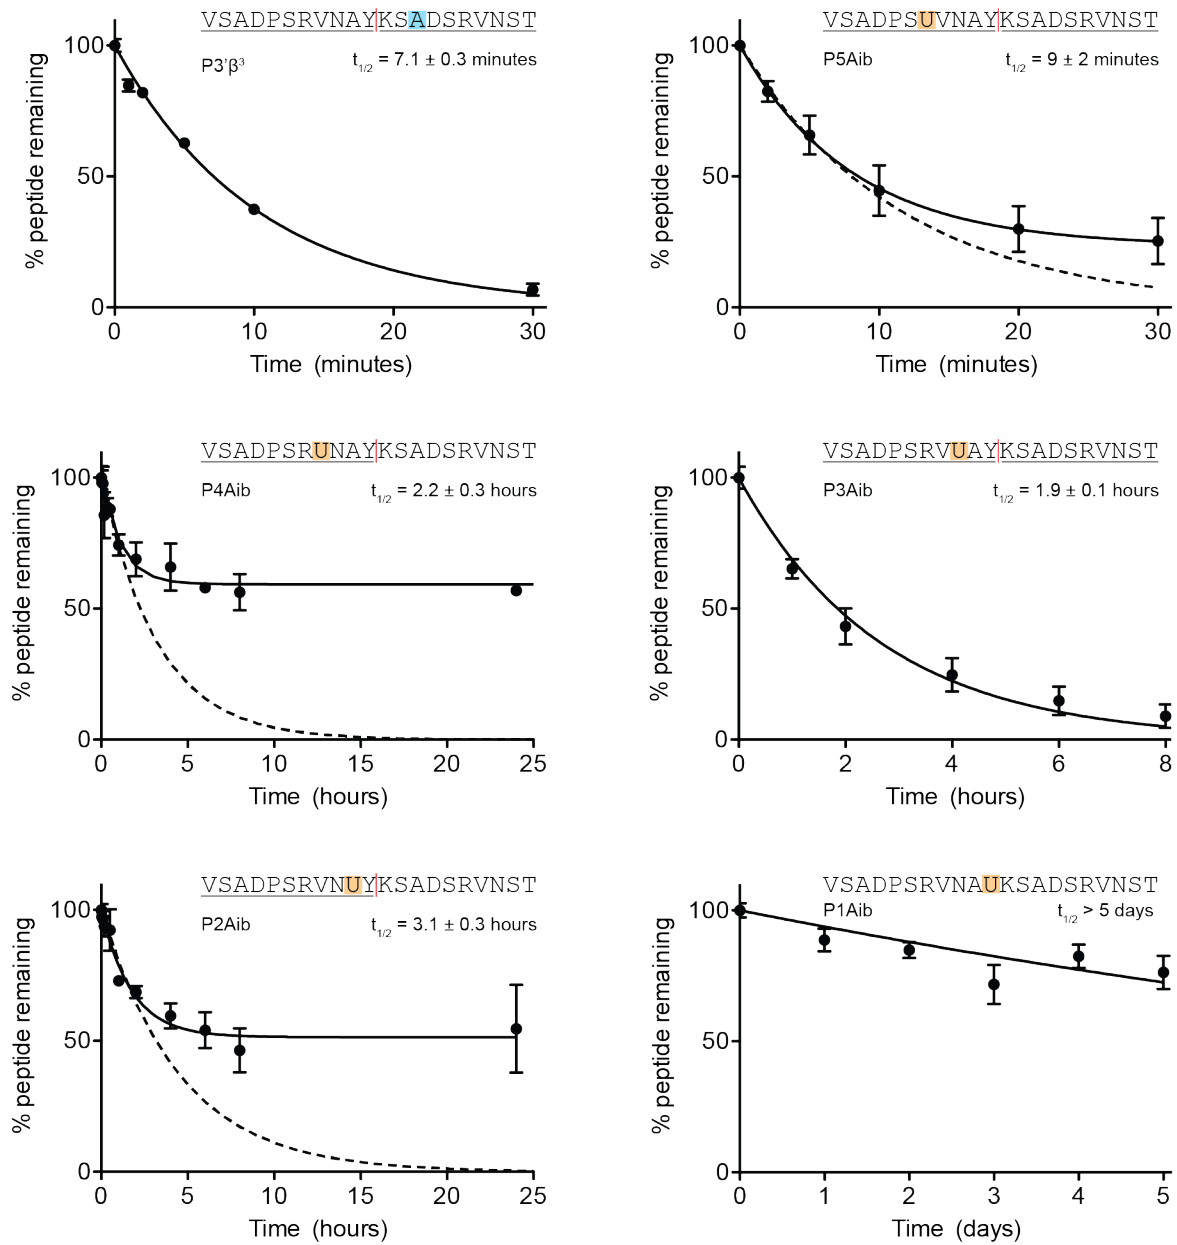

**Figure S7.** Full progress degradation curves and calculated half-lives of various peptides. Observed proteolysis products (horizontal black lines) and corresponding cleavage sites (vertical red lines) for each peptide are indicated in its sequence. Data points represent at least two replicate proteolysis experiments and are modeled by a one-phase decay fit with a variable plateau value  $Y = (Y_0 - Y_P) e^{-kx} + Y_P$  (solid curve). For peptides that did not degrade fully, the earliest data points are modeled by a one-phase decay model with a plateau constrained to zero  $Y = (Y_0) e^{-kx}$  (hashed curve).



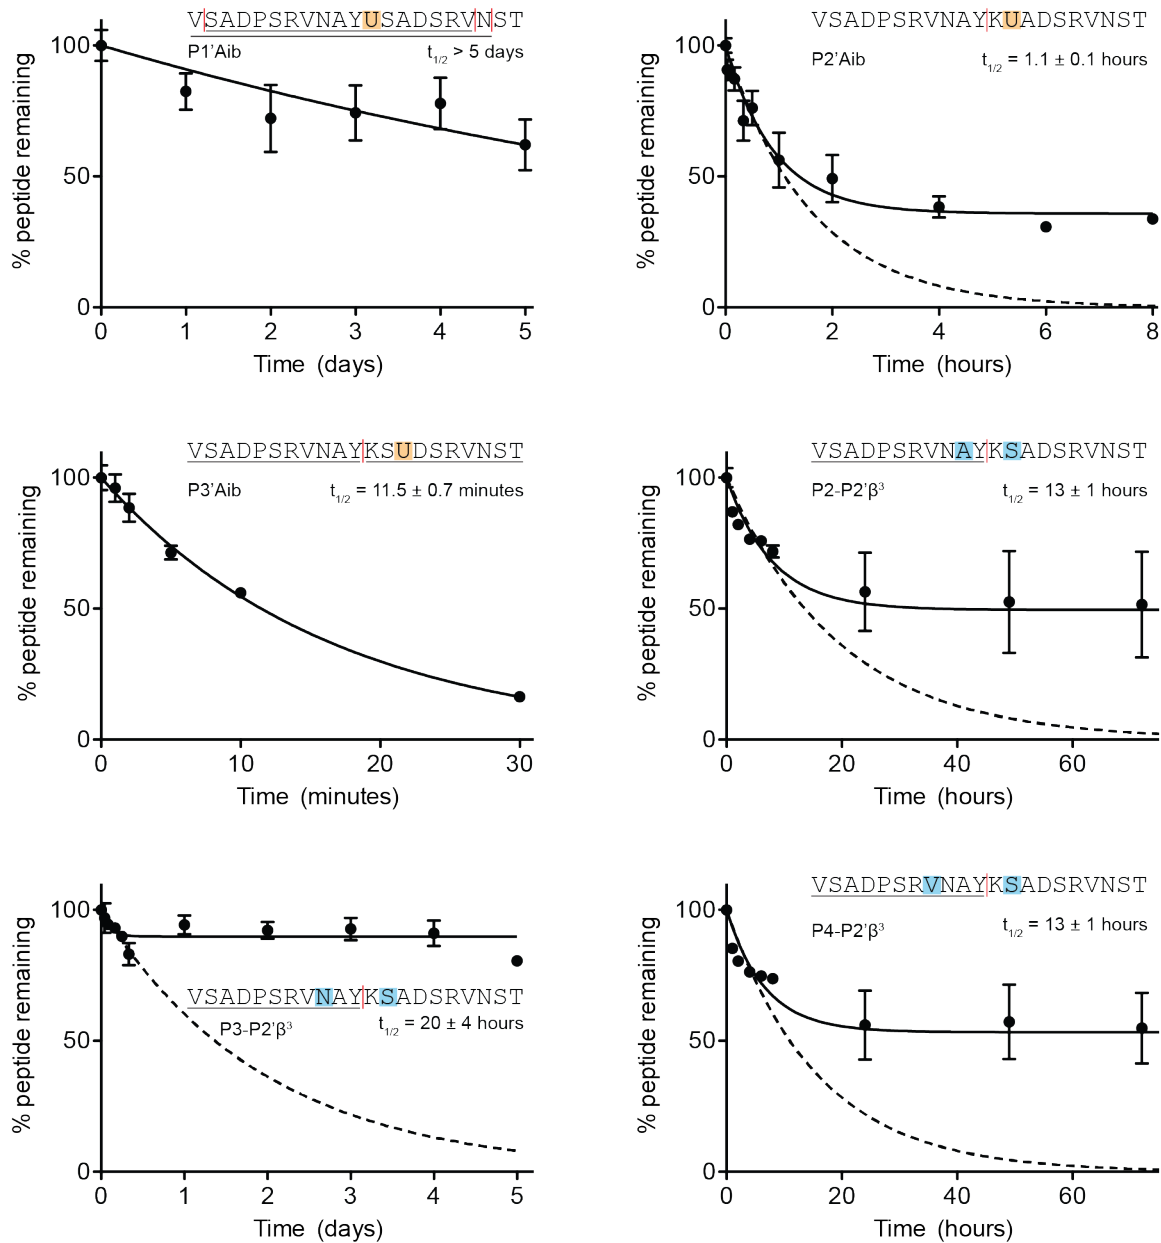

**Figure S8.** Full progress degradation curves and calculated half-lives of various peptides. Observed proteolysis products (horizontal black lines) and corresponding cleavage sites (vertical red lines) for each peptide are indicated in its sequence. Data points represent at least two replicate proteolysis experiments and are modeled by a one-phase decay fit with a variable plateau value  $Y = (Y_0 - Y_p) e^{-kx} + Y_p$  (solid curve). For peptides that did not degrade fully, the earliest data points are modeled by a one-phase decay model with a plateau constrained to zero  $Y = (Y_0) e^{-kx}$  (hashed curve).

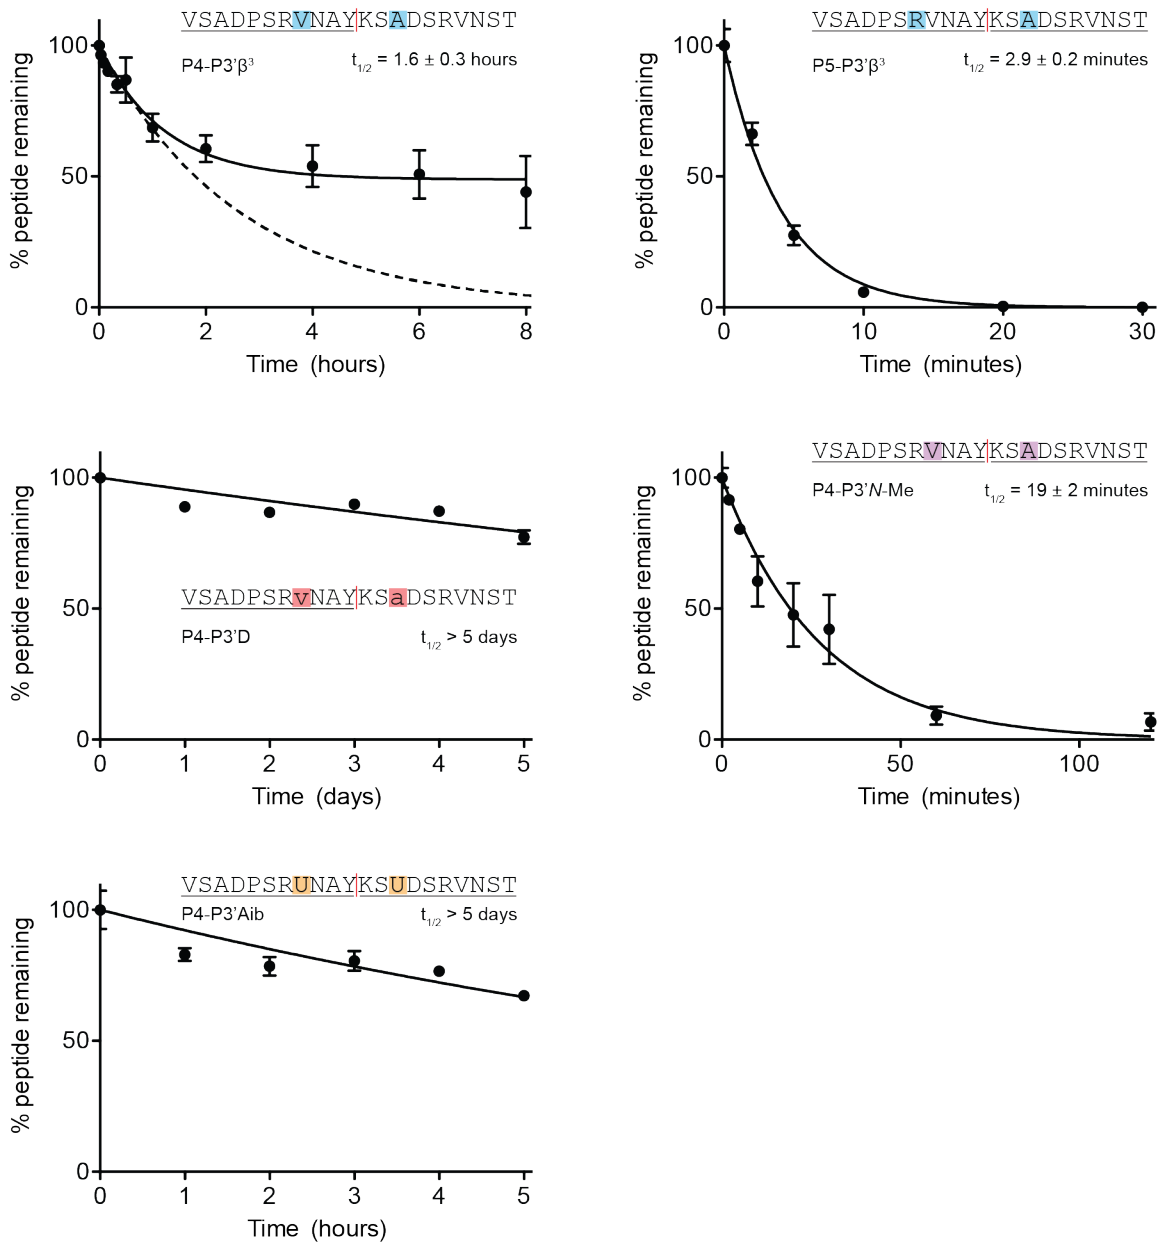

**Figure S9.** Full progress degradation curves and calculated half-lives of various peptides. Observed proteolysis products (horizontal black lines) and corresponding cleavage sites (vertical red lines) for each peptide are indicated in its sequence. Data points represent at least two replicate proteolysis experiments and are modeled by a one-phase decay fit with a variable plateau value  $Y = (Y_0 - Y_P) e^{-kx} + Y_P$  (solid curve). For peptides that did not degrade fully, the earliest data points are modeled by a one-phase decay model with a plateau constrained to zero  $Y = (Y_0) e^{-kx}$  (hashed curve).
